# Supplementary material for: Mycofabrication of Silver Oxide Nanoparticles Derived from Aspergillus Terreus FC36AY1 and its Potent Antimicrobial, Antioxidant, and Anti-Angiogenesis Activities
Source: Research Square preprint supplement (doi:10.21203/rs.3.rs-735114/v1), 2021-08-18
Supplement: Supplementary file 1 [file 0f5203a7e041798700db12f9.docx]

**Supplementary Tables**

**Table S1.** Screening for antagonistic activity for endophytic fungal isolates

| S. No. | Color of the metabolites produced | Isolates | Diameter of Zone of inhibition against common human pathogens (in cm) | | | | | | | | | | | |
| --- | --- | --- | --- | --- | --- | --- | --- | --- | --- | --- | --- | --- | --- | --- |
| *S. typhi* | *S. aureus* | *S. epidermidis* | *E. coli* | *P. aeruginosa* | *K. pnemoniae* | *E. fecalis* | *Shigella sp* | *P. mirabilis* | *B. subtilis* | *C. albicans* | *A. niger* |
| 1 | Yellow | FC4AY1 | 0 | 0.2 | 0.6 | 0.1 | 0.8 | 0.9 | 1.1 | 0 | 0 | 0 | 0 | 0 |
| 2 | FC5AY1 | 1.1 | 1.0 | 0.2 | 0.3 | 0.1 | 0.7 | 0 | 0 | 0.5 | 0.6 | 0 | 0.3 |
| 3 | FC8AY1 | 0.3 | 0.5 | 0.7 | 0.2 | 1.2 | 0 | 0.5 | 0.2 | 0 | 1.1 | 0.1 | 0.1 |
| 4 | FC21AY1 | 0.4 | 0.2 | 0.1 | 0.5 | 0 | 1.0 | 1.7 | 0 | 1.2 | 0.5 | 0 | 0.5 |
| 5 | **FC36AY1** | **1.1** | **1.6** | **1.2** | **2.1** | **2.4** | **2.2** | **1.8** | **1.6** | **1.0** | **0.6** | **2.1** | **2.2** |
| 6 | FC33AY1 | 0 | 0.4 | 0.1 | 0.6 | 1.0 | 0 | 0.5 | 0 | 0 | 0 | 0.7 | 0 |
| 7 | FC27AY1 | 0.2 | 0.5 | 0.9 | 0.7 | 0 | 0.2 | 0 | 0.6 | 0 | 0 | 0 | 0.3 |
| 8 | FC6AY1 | 0.4 | 0.3 | 0.1 | 0.6 | 1.0 | 0 | 0.4 | 0.3 | 0 | 1.2 | 0.2 | 0 |
| 9 | FC3AY1 | 0.1 | 0 | 0.8 | 0.5 | 0 | 0.2 | 0 | 0.3 | 0 | 0.9 | 0.1 | 0.9 |
| 10 | **FC25BY1** | **1.8** | **2.0** | **0** | **2.1** | **2.8** | **1.2** | **2.1** | **1.5** | **0** | **0** | **0** | **0** |
| 11 | FC18BY1 | 0.3 | 0.5 | 0 | 0.6 | 1.0 | 0.1 | 0.4 | 0.9 | 0 | 0.7 | 0.7 | 0.5 |
| 12 | FC7BY1 | 0 | 0.2 | 0 | 0.7 | 0.8 | 0 | 0.1 | 0 | 1.0 | 0 | 0 | 1.2 |
| 13 | FC30BY1 | 1.0 | 0.4 | 1.0 | 0.2 | 0.5 | 0.1 | 0 | 0.2 | 0.7 | 0 | 0.3 | 0 |
| 14 | FC28BY1 | 0.1 | 0 | 0.5 | 0.2 | 0.6 | 0 | 0.9 | 1.0 | 0 | 0 | 0.9 | 1.2 |
| 15 | FC16BY1 | 0.3 | 0.7 | 0.5 | 0.9 | 0 | 0.1 | 0.3 | 0.4 | 0.2 | 1.1 | 0 | 0.8 |
| 16 | FC2BY1 | 0.4 | 0.6 | 0.9 | 1.2 | 0 | 0.5 | 0.8 | 0.1 | 0 | 1.2 | 0.6 | 0.9 |
| 17 | Brown | FC13BBr | 0.2 | 0.1 | 0.3 | 0.8 | 0.4 | 0.6 | 0.9 | 0.7 | 0 | 0.9 | 1.0 | 0.5 |
| 18 | FC1BBr | 0.1 | 0 | 0.5 | 0.2 | 0.6 | 0 | 0.9 | 1.0 | 0 | 0 | 0.9 | 1.2 |
| 19 | FC28BBr | 0.3 | 0.5 | 0 | 0.6 | 1.0 | 0.1 | 0.4 | 0.9 | 0 | 0 | 0.7 | 0.5 |
| 20 | FC26BBr | 0.4 | 0.6 | 0.9 | 1.2 | 0 | 0.5 | 0.8 | 0.1 | 0 | 0.9 | 0.6 | 0.9 |
| 21 | FC25BBr | 0.1 | 0 | 0.8 | 0.5 | 0 | 0.2 | 0 | 0.3 | 0 | 0.7 | 0.1 | 0.9 |
| 22 | FC11BBr | 0.2 | 0.1 | 0.3 | 0.8 | 0.4 | 0.6 | 0.9 | 0.7 | 0 | 0.9 | 1.0 | 0.5 |
| 23 | **FC39BBr** | **1.8** | **0** | **2.0** | **1.0** | **1.0** | **1.2** | **1.8** | **2.1** | **1.0** | **0** | **1.1** | **2.1** |
| 24 | **FC3ABr** | **0** | **2.2** | **1.5** | **1.8** | **1.3** | **0** | **1.6** | **1.0** | **0.8** | **1.1** | **0.9** | **2.7** |
| 25 | FC29ABr | 0.1 | 0 | 0.8 | 0.5 | 0 | 0.2 | 0 | 0.3 | 0 | 0.9 | 0.1 | 0.9 |
| 26 | FC17ABr | 0.4 | 0.6 | 0.9 | 1.2 | 0 | 0.5 | 0.8 | 0.1 | 0 | 0 | 0.6 | 0.9 |
| 27 | FC19ABr | 0.2 | 0.1 | 0.3 | 0.8 | 0.4 | 0.6 | 0.9 | 0.7 | 0 | 0 | 1.0 | 0.5 |
| 28 | FC8ABr | 0.1 | 0 | 0.8 | 0.5 | 0 | 0.2 | 0 | 0.3 | 0 | 0 | 0.1 | 0.9 |
| 29 | FC36ABr | 0.1 | 0 | 0.5 | 0.2 | 0.6 | 0 | 0.9 | 1.0 | 0 | 0.7 | 0.9 | 1.2 |
| 30 | Green | **FC32AGr** | **1.0** | **1.2** | **1.3** | **1.9** | **1.1** | **1.8** | **0** | **0** | **1.0** | **0** | **1.5** | **3.2** |
| 31 | FC24Gr | 0.2 | 0.5 | 0.9 | 0.7 | 0 | 0.2 | 0 | 0.6 | 0. | 0.9 | 0 | 0.3 |
| 32 | FC31Gr | 0.2 | 0.1 | 0.3 | 0.8 | 0.4 | 0.6 | 0.9 | 0.7 | 0 | 0.7 | 1.0 | 0.5 |
| 33 | FC36Gr | 0.1 | 0 | 0.5 | 0.2 | 0.6 | 0 | 0.9 | 1.0 | 0 | 1.1 | 0.9 | 1.2 |
| 34 | FC10Gr | 0.1 | 0 | 0.8 | 0.5 | 0 | 0.2 | 0 | 0.3 | 0 | 0.9 | 0.1 | 0.9 |
| 35 | FC11Gr | 0.2 | 0.1 | 0.3 | 0.8 | 0.4 | 0.6 | 0.9 | 0.7 | 0 | 0 | 1.0 | 0.5 |

**Table S2.** DPPH Radical Scavenging activity of 35 pigmented endophytic fungal strains

| **S. No.** | **Color of the metabolites produced** | **Isolates** | **DPPH radical scavenging activity (in %)** | |
| --- | --- | --- | --- | --- |
| **50 µg/ml** | **100 µg/ml** |
| 1 | Yellow | FC4AY1 | 9.717±0.54 | 13.8±0.5 |
| 2 | FC5AY1 | 23.19±0.2 | 32.6±0.02 |
| 3 | FC8AY1 | 8.78±0.12 | 11.59±0.031 |
| 4 | FC21AY1 | -3.134±0.55 | 0 |
| 5 | **FC36AY1** | 51.2±0.2 | 56.78±0.02 |
| 6 | FC33AY1 | 6.58±3.2 | 10.658±0.5 |
| 7 | FC27AY1 | 0 | 0 |
| 8 | FC6AY1 | -0.94±0.32 | -10.03 |
| 9 | FC3AY1 | 10.04±0.05 | 13.79±0.043 |
| 10 | **FC25BY1** | 12.86±0.9 | 22.34±0.055 |
| 11 | FC18BY1 | 0±0.09 | 10.658±0.5 |
| 12 | FC7BY1 | 0 | 0 |
| 13 | FC30BY1 | 6.58±0.2 | 13.479±0.2 |
| 14 | FC28BY1 | 16.61±0.5 | 24.5±0.5 |
| 15 | FC16BY1 | -3.23±0.5 | -11.32 |
| 16 | FC2BY1 | 0 | 0 |
| 17 | Brown | FC13BBr | 6.72±0.2 | 14.92±0.5 |
| 18 | FC1BBr | 2.21±0.09 | 7.65±0.5 |
| 19 | FC28BBr | 7.21±0.05 | 8.78±0.75 |
| 20 | FC26BBr | 2.51±0.03 | 7.21±0.5 |
| 21 | FC25BBr | 5.642±0.2 | 11.912±0.01 |
| 22 | FC11BBr | 0 | 0 |
| 23 | **FC39BBr** | 13.48±0.95 | 30.4±0.76 |
| 24 | **FC3ABr** | 15.05±0.02 | 18.18±0.02 |
| 25 | FC29ABr | 0 | 0 |
| 26 | FC17ABr | 19.75±0.5 | 25.71±0.1 |
| 27 | FC19ABr | 21.31±0.75 | 29.78±0.5 |
| 28 | FC8ABr | -0.32±0 | -11.41 |
| 29 | FC36ABr | 15.05±0.76 | 19.71±0.9 |
| 30 | Green | **FC32AGr** | 19.75±0.02 | 32.6±0.6 |
| 31 | FC24Gr | -4.32±0.02 | -12.89 |
| 32 | FC31Gr | 16.92±0.2 | 24.45±0.5 |
| 33 | FC36Gr | 8.78±0.02 | 15.05±0.2 |
| 34 | FC10Gr | 0 | 0 |
| 35 | FC11Gr | 12.86±0.9 | 22.34±0.055 |
